# Supplementary material for: Metal ion mediated transition from random coil to β-sheet and aggregation of Bri2-23, a natural inhibitor of Aβ aggregation
Source: Royal Society of Chemistry journal article supplement (doi:10.1039/c4mt00274a), 2015-01-01
Supplement: c4mt00274a1.pdf [file c4mt00274a1.pdf]

## Electronic Supplementary Information for

**Metal ion mediated transition from random coil to  $\beta$ -sheet and aggregation of Bri2-23, the natural inhibitor of A $\beta$  aggregation.**

Marek Luczkowski,<sup>†\*</sup> Riccardo De Ricco,<sup>‡</sup> Monika Stachura,<sup>§</sup> Slawomir Potocki,<sup>†</sup> Lars Hemmingsen,<sup>§</sup> Daniela Valensin<sup>‡\*</sup>

<sup>†</sup>*Faculty of Chemistry, University of Wroclaw, F. Joliot Curie 14, 50-383 Wroclaw, Poland*

<sup>‡</sup>*Department of Biotechnology, Chemistry and Pharmacy, University of Siena, Via A. Moro 2, 53100 Siena, Italy*

<sup>§</sup>*Department of Chemistry, University of Copenhagen, Universitetsparken 5, 2100 Copenhagen, Denmark*

\* e-mail: marek.luczkowski@chem.uni.wroc.pl, daniela.valensin@unisi.it

### Mass spectrometry analysis of ternary system

We performed mass spectrometry studies of the system in alkaline pH in the presence cysteine as a competing ligand. Our aim was to corroborate the formation of negatively charged ternary complex species in solution. Crude analysis of the data reveal the presence of binary Hg(II) complexes of BRI ( $m/Z = 941.75$  for  $Z = -3$  and  $1413.12$  for  $Z = -2$ ) coexisting with various adducts (e.g  $m/Z = 1482.57$  or  $1511.55$ ) of its ternary complexes with cysteine (Figure 1S). The detailed isotopic profile of one of these adducts of ternary complex of mercury(II), BRI2-23 and cysteine coalesces with  $\text{Na}^+$ ,  $\text{Cl}^-$  and  $\text{NH}_4^+$  ( $m/Z = 1511.55$ ) is shown in figure 2S. What is worth to mention, no BRI2-23 complexes of general  $\text{HgL}_2$  stoichiometry were detected at this experimental condition. The detection of ternary species corroborates the potentiometrically assessed model and strengthens the consistency of calculated formation constants. Besides, the predominance of ternary complexes in strongly alkaline pH range for corresponding system has been previously reported.<sup>1</sup>

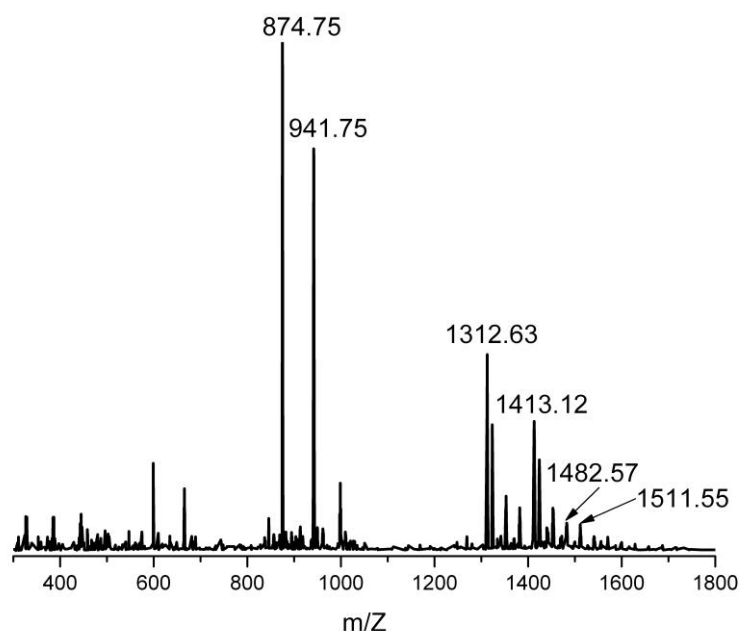

Figure 1S. ESI-MS spectra of Hg(II) complex of BRI2-23 peptide at pH 11 in ammonium hydroxide (0.4M).  $c_{\text{BRI2-23}} = 1 \times 10^{-4} \text{M}$ ; Hg(II)/BRI2-23/Cys ratio 1:1:1; MeOH/H<sub>2</sub>O = 1:2.

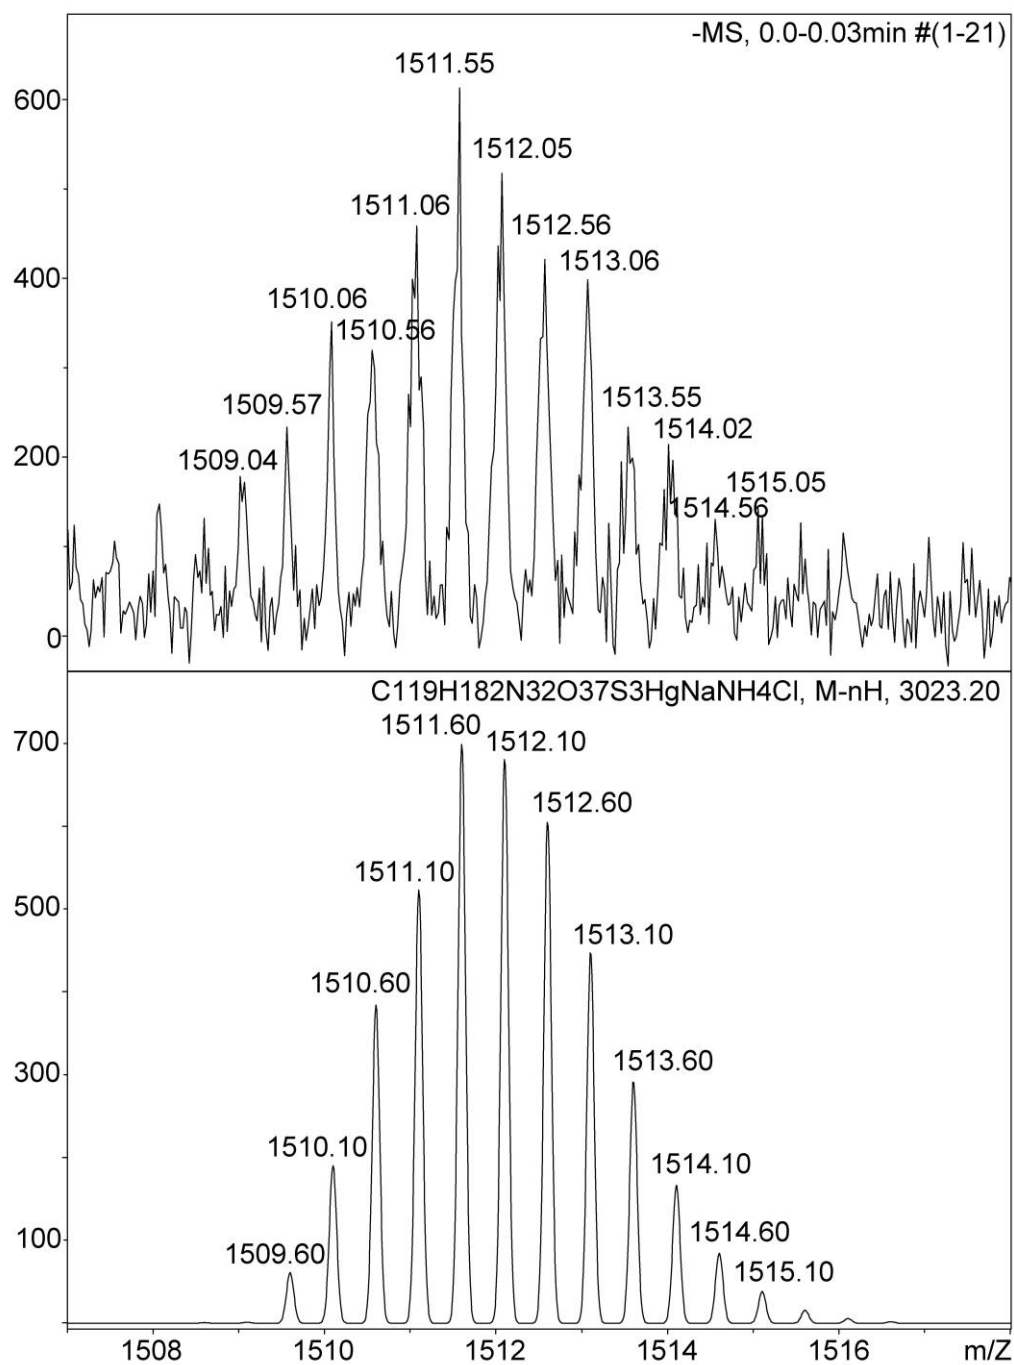

Figure 2S. Isotopic profile of ternary Hg(II) complex species of BRI2-23 and cysteine at pH 11 in ammonium hydroxide (0.4M). [BRI2-23]  $1 \times 10^{-4}$  M; Hg(II)/BRI2-23/Cys ratio 1:1:1; MeOH/H<sub>2</sub>O = 1:2.

### *Isothermal titration calorimetry*

The binding affinity  $K_a$  for the Hg(II) complexes of BRI2-23, and their associated thermodynamic parameters are summarized in Figure 3S.

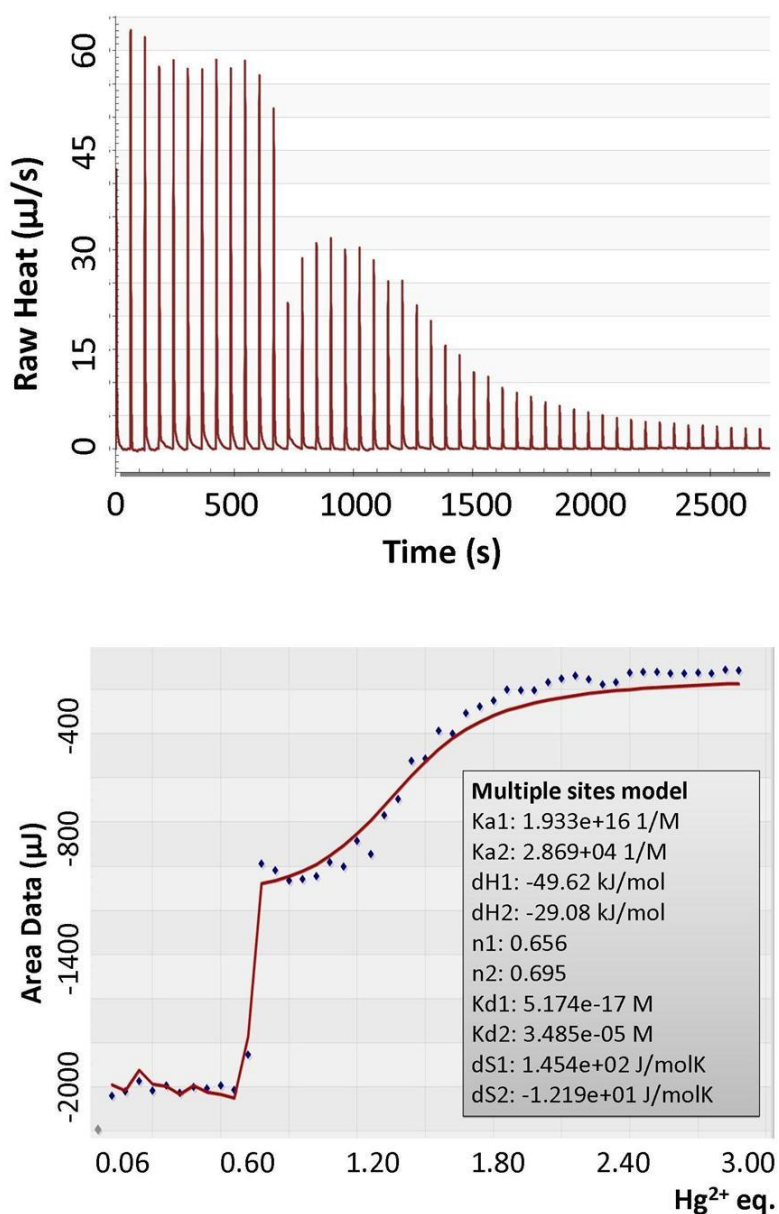

Figure 3S. Total measured heat associated with titration of BRI peptide with Hg(II) (upper panel), and the binding isotherm derived from the enthalpy of each injection in the function of molar Hg(II) equivalents (lower panel).

BRI2-23 peptide shows two exothermic phenomena while titrated with Hg(II), analogically to previously reported other cysteinyl peptides.<sup>2-4</sup> A strong exothermic association is identified at the beginning of each titration of Hg(II) into BRI2-23 peptide. This may reflect the formation of Hg–S coordinate bond(s) that yield exceptionally high  $K_a$  formation constants. This would be consistent with the binding preferences of mercury(II), a soft acid that has a tendency to form linear thiolate complexes.<sup>5-6</sup>  $K_a$  for Hg(II) and thiols interaction is usually a number to the power of over a dozen,<sup>4</sup> what is not an optimal range for Nano-ITC instrument. The  $c$  parameter (defined in this case as  $[BRI]/K_d$ ) equals to  $9.66 \times 10^{12}$ , what is much too high for the optimal value.<sup>7</sup> Moreover, as shown in Figure 3S, the curve fitting for this very tight first binding is limited to 1-2 data points. For these two reasons, the association constant for this particular interaction is adapted from the potentiometric data and kept constant during the calculations of other thermodynamic parameters.<sup>8</sup> As we know from MS and NMR spectra evaluation, intramolecular complexes are exclusively formed at low ( $\sim 0.5$ ) metal content. Superficial analysis of ITC plot, that clearly shows two processes, indicates that formation of equimolar species is indistinguishable from formation of further intermolecular complex species, while formation of metal induced organized structures are observed above 0.7 Hg<sup>2+</sup>/BRI molar ratio. This is with good agreement with NMR data (*vide infra*) that signify the mixture of metallic species at 0.7 Hg<sup>2+</sup>/BRI molar ratio followed by formation of highly organized structures. We assume that some other indistinguishable inter-molecular phenomenon occurs. The second  $K_a$  binding constant ( $2.9e^4/M$ ) reflects the binding of subsequent Hg(II) ions followed by structural rearrangement of the peptide backbone. However, since the exact complex species composition and their distribution profile at higher Hg(II) concentration is not known, the impact of metal sequestration and structural rearrangement of the peptide cannot be readily distinguished in energy profile. We believe that many factors contribute to the thermodynamic

profile of BRI2-23 interaction with Hg(II) ions. On the top of previously mentioned, seed formation leading to aggregation is highly possible scenario. Finally, from the thermodynamic point of view system is saturated when Hg(II)/BRI molar ratio reaches 2.

The large heat flow induced during the first step of the interaction of  $\text{Hg}^{2+}$  ions with BRI peptide results in exceedingly high enthalpy change  $\Delta H_1 = -49.62 \text{ kJ/mol}$ , what suggests strongly that thiol of cysteine residues are the binding sites. Interactions between soft acceptor and soft donor are typically strongly exothermic.<sup>9</sup> The positive entropy,  $\Delta S_1 = 0.145 \text{ kJ/mol}$ , may indicate the formation of disordered structure, where main driving forces are hydrophobic interactions and associated release of water. However, large enthalpic contribution shows, that this is an enthalpy-controlled thermodynamic process where the formation of coordinate and hydrogen bonds together with van der Waals interactions play an critical role. The negative value of  $\Delta H$  and positive value of  $\Delta S$  indicate highly spontaneous process ( $\Delta G^\circ = \Delta H^\circ - T\Delta S^\circ$ ). The second process is described with the following set of parameters:  $K_{d2} = 3.49 \times 10^{-5}$ ,  $\Delta H_1 = -29.08 \text{ kJ/mol}$  and  $\Delta S = -0.012 \text{ kJ/mol}$ . As for the lower Hg(II)/BRI2-23 ratios, the enthalpic factor predominates indicating high coordinate and hydrogen bonds impact on the new structure formation, whereas negative entropy reveals different nature of the interaction and the formation of higher, well organized, intermolecular structures.

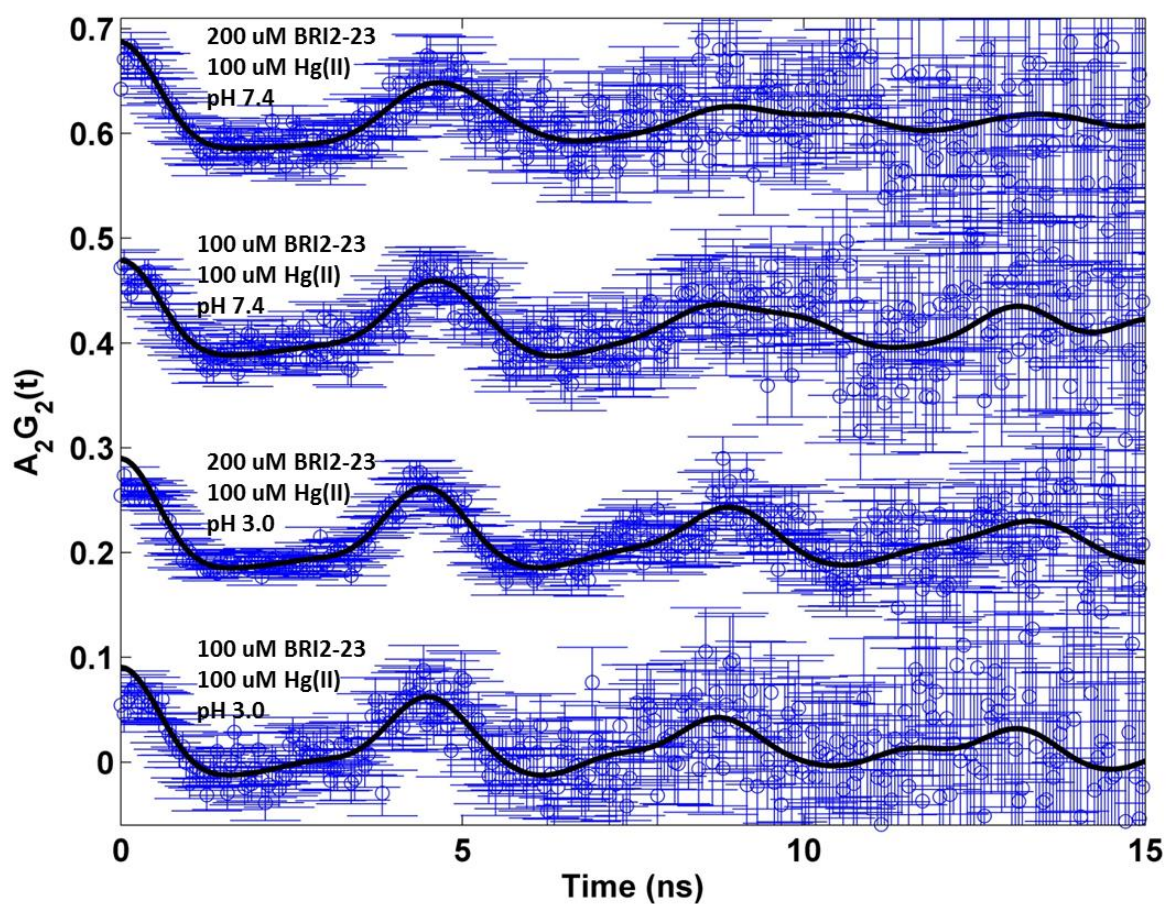

Figure 4S.  $^{199\text{m}}\text{Hg}$  PAC data for BRI2-23 under the indicated experimental conditions. Blue: Experimental data-points with error bars; black: Fit with the NQI parameters presented in Table 1S.

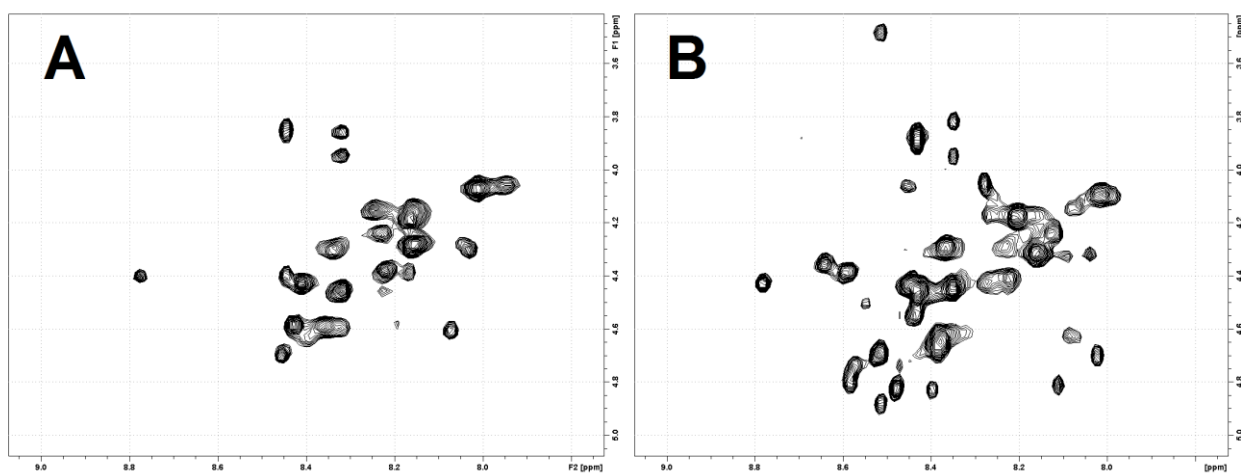

Figure 5S. 2D  $^1\text{H}$ - $^1\text{H}$  TOCSY spectra (NH-H $\alpha$  region) of Bri2-23 0.5mM in  $\text{H}_2\text{O}:\text{D}_2\text{O}$  90:10 at 298K and pH 3.0 in presence of A) 0.9 equivalents of Ag(I) ions; B) 0.9 equivalents of Hg(II) ions.

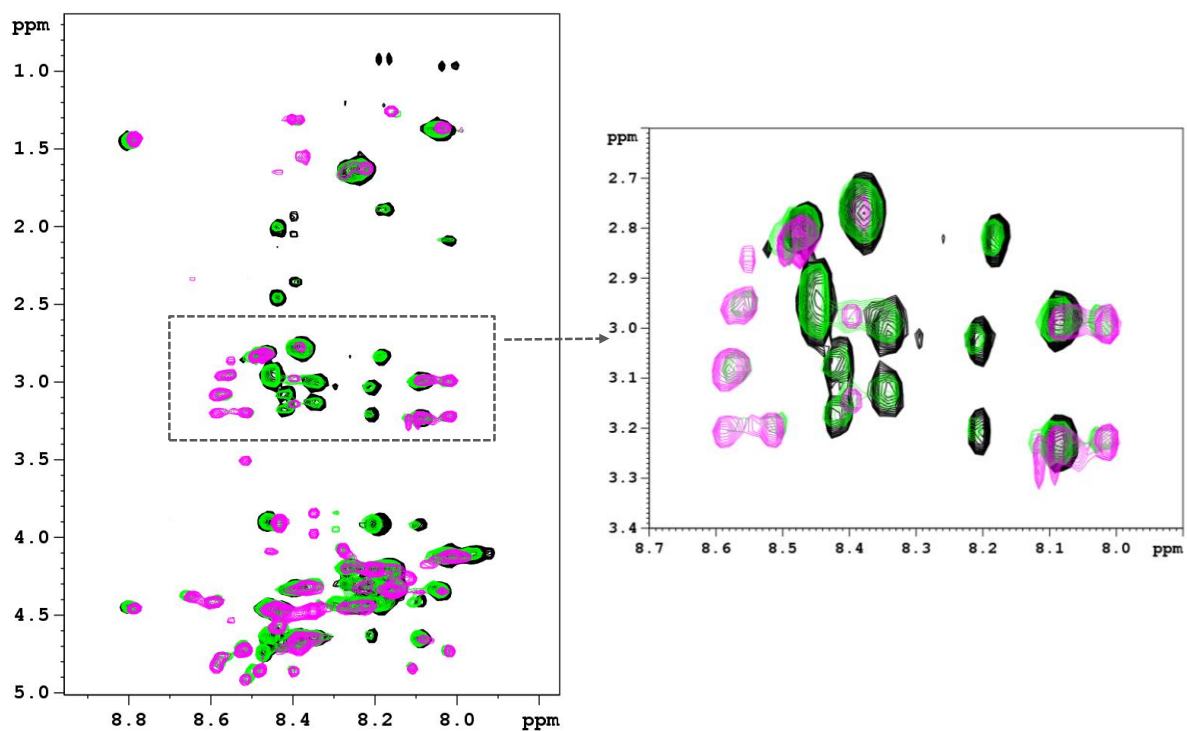

Figure 6S. 2D  $^1\text{H}$ - $^1\text{H}$  TOCSY spectra of Bri2-23 0.5mM in  $\text{H}_2\text{O}:\text{D}_2\text{O}$  90:10 at 298K and pH 3.0 (black) in presence of 0.5 equivalents of  $\text{Hg}(\text{II})$  ions (green); in presence of 0.9 equivalents of  $\text{Hg}(\text{II})$  ions (magenta).



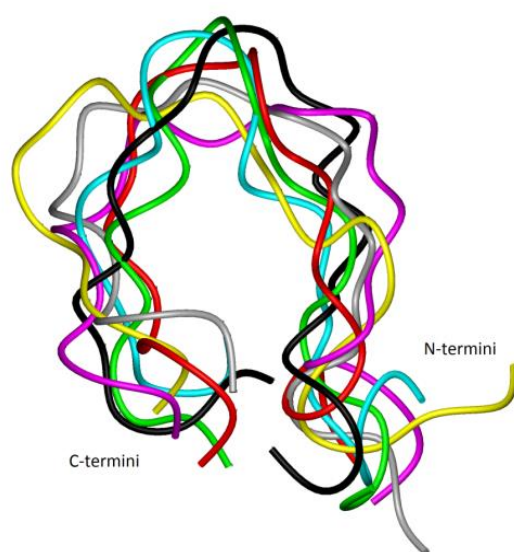

Figure 7S. Superimposed selected structures obtained by NMR DYANA calculation.

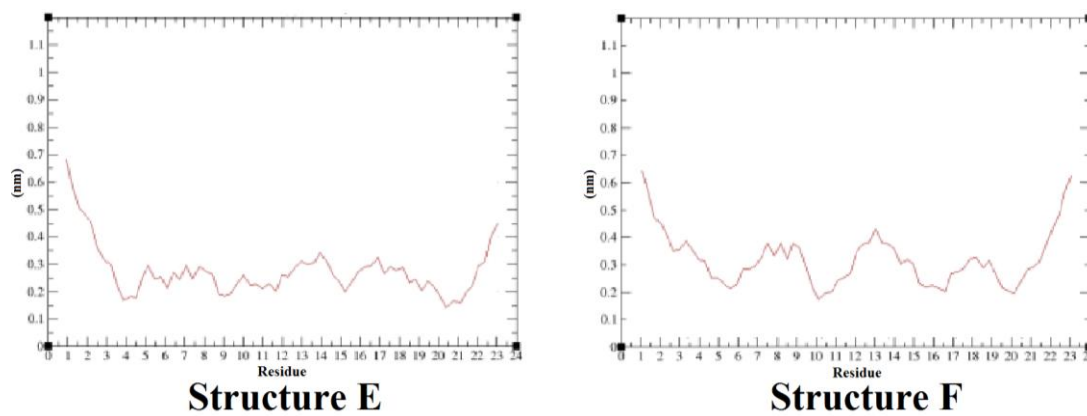

Figure 8S. RMS fluctuation calculated for each residues of structures E and F.

Table 1S. Parameters fitted to PAC-data. The numbers in parenthesis are the standard deviations of the fitted parameters.

| BRI           | Hg(II)        | pH  | $\nu_Q$             | $\eta$             | $\Delta\omega_0/\omega_0$ | $1/\tau_c$         | A              | $\chi^2$ |
|---------------|---------------|-----|---------------------|--------------------|---------------------------|--------------------|----------------|----------|
| $\mu\text{M}$ | $\mu\text{M}$ |     | GHz                 |                    | $\times 100$              | $\mu\text{s}^{-1}$ | $\times 100$   |          |
| 200           | 100           | 7.4 | 1.47(8)<br>1.25(6)  | 0.1(1)<br>0f       | 7(5)<br>0(10)             | 0(15)              | 12(6)<br>2(5)  | 0.62     |
| 100           | 100           | 7.4 | 1.51(6)<br>1.32(4)  | 0.18(6)<br>0.19(7) | 2(4)<br>0(5)              | 0(17)              | 8(5)<br>5(5)   | 0.59     |
| 200           | 100           | 3.0 | 1.48(1)             | 0.18(2)            | 3.6(9)                    | 18(9)              | 15.3(9)        | 0.79     |
| 100           | 100           | 3.0 | 1.51(5)<br>1.32(14) | 0.24(5)<br>0.2(1)  | 0(5)<br>4(9)              | 20(23)             | 9(10)<br>6(10) | 0.50     |

Table 2S.  $^1\text{H}$  Chemical Shift of Bri2-23 0.5mM in  $\text{H}_2\text{O}:\text{D}_2\text{O}$  90:10 at 298K and pH 3.0

| Free   | NH   | Ha   | Hb   | Hg   | Hd   | other | other |
|--------|------|------|------|------|------|-------|-------|
| Glu-1  | nd   | 4,08 | 2,11 | 2,53 |      |       |       |
| Ala-2  | 8,79 | 4,42 | 1,42 |      |      |       |       |
| Ser-3  | 8,46 | 4,41 | 3,87 |      |      |       |       |
| Asn-4  | 8,47 | 4,71 | 2,78 |      |      | 6,90  | 7,58  |
| Cys-5  | 8,19 | 4,41 | 2,81 |      |      |       |       |
| Phe-6  | 8,21 | 4,61 | 3,09 |      |      | 7,25  | 7,34  |
| Ala-7  | 8,07 | 4,28 | 1,34 |      |      |       |       |
| Ile-8  | 7,95 | 4,08 | 1,81 | 1,17 | 0,82 |       |       |
| Arg-9  | 8,26 | 4,26 | 1,66 | 1,50 | 1,57 | 7,14  | 3,14  |
| His-10 | 8,42 | 4,65 | 3,10 |      |      | 8,56  | 7,16  |
| Phe-11 | 8,35 | 4,62 | 3,04 |      |      | 7,32  | 7,22  |
| Glu-12 | 8,36 | 4,30 | 1,97 | 2,36 |      |       |       |
| Asn-13 | 8,37 | 4,60 | 2,76 |      |      | 6,96  | 7,61  |
| Lys-14 | 8,27 | 4,16 | 1,63 | 1,19 | 1,58 | 2,90  | 7,50  |
| Phe-15 | 8,09 | 4,61 | 3,06 |      |      | 7,26  | 7,34  |
| Ala-16 | 8,05 | 4,31 | 1,36 |      |      |       |       |
| Val-17 | 8,03 | 4,09 | 2,06 | 0,94 |      |       |       |
| Glu-18 | 8,43 | 4,44 | 2,04 | 2,45 |      |       |       |
| Thr-19 | 8,18 | 4,30 | 4,15 | 1,18 |      |       |       |
| Leu-20 | 8,24 | 4,39 | 1,59 | 1,59 | 0,88 |       |       |
| Ile-21 | 8,18 | 4,20 | 1,87 | 1,19 | 0,89 |       |       |
| Cys-22 | 8,45 | 4,60 | 2,93 |      |      |       |       |
| Ser-23 | 8,31 | 4,45 | 3,91 |      |      |       |       |

Table 3S. Chemical Shift of Bri2-23 0.5mM in H<sub>2</sub>O:D<sub>2</sub>O 90:10 at 298K and pH 3.0 in presence of 0.7 eqs. of HgII ions (X form)

| X-form | NH   | Ha   | Hb   | Hg   | Hd   | other | other |
|--------|------|------|------|------|------|-------|-------|
| Glu-1  | nd   | 4,09 | 2,18 | 2,55 |      |       |       |
| Ala-2  | 8,79 | 4,43 | 1,43 |      |      |       |       |
| Ser-3  | 8,44 | 4,47 | 3,89 |      |      |       |       |
| Asn-4  | 8,49 | 4,84 | 2,82 |      |      | 6,91  | 7,58  |
| Cys-5  | 8,40 | 4,70 | 3,30 |      |      |       |       |
| Phe-6  | 8,12 | 4,82 | 3,10 |      |      | 7,17  | 7,29  |
| Ala-7  | 8,41 | 4,68 | 1,31 |      |      |       |       |
| Ile-8  | 8,37 | 4,30 | 1,79 | 1,17 | 0,80 |       |       |
| Arg-9  | 8,45 | 4,56 | 1,65 | 1,40 | 1,51 | 7,15  | 3,11  |
| His-10 | 8,59 | 4,79 | 3,11 |      |      | 8,58  | 7,29  |
| Phe-11 | 8,41 | 4,84 | 3,01 |      |      | 7,30  | 7,17  |
| Glu-12 | 8,65 | 4,36 | 1,99 | 2,33 |      |       |       |
| Asn-13 | 8,56 | 4,51 | 2,90 |      |      | 6,99  | 7,64  |
| Lys-14 | 8,29 | 4,05 | 1,69 | 1,18 | 1,57 | 2,90  | 7,49  |
| Phe-15 | 8,03 | 4,70 | 3,09 |      |      | 7,27  | 7,36  |
| Ala-16 | 8,17 | 4,32 | 1,26 |      |      |       |       |
| Val-17 | 8,02 | 4,10 | 2,08 | 0,94 |      |       |       |
| Glu-18 | 8,43 | 4,44 | 2,05 | 2,45 |      |       |       |
| Thr-19 | 8,46 | 4,45 | 4,07 | 1,16 |      |       |       |
| Leu-20 | 8,43 | 4,60 | 1,58 | 1,54 | 0,81 |       |       |
| Ile-21 | 8,61 | 4,39 | 1,79 | nr   | 0,87 |       |       |
| Cys-22 | 8,52 | 4,89 | 3,34 |      |      |       |       |
| Ser-23 | 8,36 | 4,46 | 3,89 |      |      |       |       |

Table 4S. Chemical Shift of Bri2-23 0.5mM in H<sub>2</sub>O:D<sub>2</sub>O 90:10 at 298K and pH 3.0 in presence of 0.7 eqs. of HgII ions (Y form)

| Y-form | NH   | Ha   | Hb   | Hg   | Hd     | other | other |
|--------|------|------|------|------|--------|-------|-------|
| Glu-1  |      |      |      |      |        |       |       |
| Ala-2  |      |      |      |      |        |       |       |
| Ser-3  |      |      |      |      |        |       |       |
| Asn-4  | 8,40 | 4,63 | 2,76 |      |        | 6,93  | 7,61  |
| Cys-5  |      |      |      |      |        |       |       |
| Phe-6  |      |      |      |      |        |       |       |
| Ala-7  |      |      |      |      |        |       |       |
| Ile-8  |      |      |      |      |        |       |       |
| Arg-9  | 8,23 | 4,26 | 1,68 | nr   | nr     | 7,15  | 3,14  |
| His-10 |      |      |      |      |        |       |       |
| Phe-11 |      |      |      |      |        |       |       |
| Glu-12 | 8,46 | 4,31 | 1,98 | 2,36 |        |       |       |
| Asn-13 | 8,37 | 4,63 | 2,81 |      |        | 6,99  | 7,63  |
| Lys-14 | 8,27 | 4,09 | 1,62 | nr   | nr     | nr    | nr    |
| Phe-15 | 8,08 | 4,63 | 3,09 |      | da def | 7,27  | 7,36  |
| Ala-16 | 8,05 | 4,32 | 1,36 |      |        |       |       |
| Val-17 | 8,09 | 4,20 | 1,88 | 0,91 |        |       |       |
| Glu-18 | 8,52 | 4,69 | 1,96 | 2,33 |        |       |       |
| Thr-19 | 8,28 | 4,31 | 4,17 | 1,19 |        |       |       |
| Leu-20 | 8,24 | 4,41 | 1,61 | nr   | 0,87   |       |       |
| Ile-21 | 8,22 | 4,19 | 1,95 | 1,20 | 0,87   |       |       |
| Cys-22 |      |      |      |      |        |       |       |
| Ser-23 |      |      |      |      |        |       |       |

## References:

1. S. Pires, J. Habjanic, M. Sezer, C. M. Soares, L. Hemmingsen, O. Iranzo, *Inorg. Chem.*, 2012, **51**, 11339-11348.
2. X. L. Lin, J. Brooks, M. Bronson, M. Ngu-Schwemlein, *Bioorg. Chem.*, 2012, **44**, 8-18.
3. M. Ngu-Schwemlein, W. Gilbert, K. Askew, S. Schwemlein, *Bioorg. Med. Chem.*, 2008, **16**, 5778-5787.
4. M. Ngu-Schwemlein, J. K. Merle, P. Healy, S. Schwemlein, S. Rhodes, *Thermochim. Acta*, 2009, **496**, 129-135.
5. R. Strand, W. Lund, J. Aaseth, *J. Inorg. Biochem.*, 1983, **19**, 301-309.
6. W. Stricks, I. M. Kolthoff, *J. Am. Chem. Soc.*, 1953, **75**, 5673-5681.
7. W. B. Turnbull, A. H. Daranas, *J. Am. Chem. Soc.*, 2003, **125**, 14859-14866.
8. H. Kozłowski, M. Luczkowski, M. Remelli, *Dalton Trans.*, 2010, **39**, 6371-6385.
9. D. J. Yang, S. O. Shi, L. F. Zheng, T. M. Yao, L. N. Ji, *Biopolymers*, 2010, **93**, 1100-1107.
